# Supplementary material for: Ehlers-Danlos Syndrome, Hypermobility Type, Is Linked to Chromosome 8p22-8p21.1 in an Extended Belgian Family
Source: Hindawi journal article supplement (doi:10.1155/2015/828970), 2015-01-01

## **SUPPLEMENTAL INFORMATION**

### **Ehlers-Danlos syndrome, hypermobility type is linked to chromosome 8p22-8p21.1 in an extended Belgian family**

Delfien Syx, Sofie Symoens, Wouter Steyaert, Anne De Paepe, Paul Coucke, Fransiska Malfait

*Center for Medical Genetics, Ghent University Hospital, Ghent, Belgium*

**Supplementary Table 1:** Candidate genes, their chromosome localization and markers that were used for linkage analysis.

| Gene                  | Chromosome localization | Marker                                                                                               |
|-----------------------|-------------------------|------------------------------------------------------------------------------------------------------|
| <i>COL1A1</i>         | 17q21.3-q22             | <i>D17S1795</i><br><i>D17S1820</i>                                                                   |
| <i>COL1A2</i>         | 7q21.3-q22              | <i>D7S527</i><br><i>D7S657</i><br><i>D7S1820</i><br><i>D2S2262</i>                                   |
| <i>COL3A1; COL5A2</i> | 2q32.2; 2q24.3-31       | <i>D2S389</i><br><i>D2S118</i>                                                                       |
| <i>COL5A1</i>         | 9q34.2-q34.3            | <i>D9S1818</i><br><i>D9S1826</i><br><i>D9S1793</i><br><i>D9S67</i><br><i>D9S114</i><br><i>D9S158</i> |
| <i>TNXB</i>           | 6p21.3                  | <i>D6S1014</i><br><i>D6S2443</i>                                                                     |

**Supplementary Figure S1:** Overview of the candidate region. Printscreen from UCSC Genome Browser (<https://genome.ucsc.edu>).

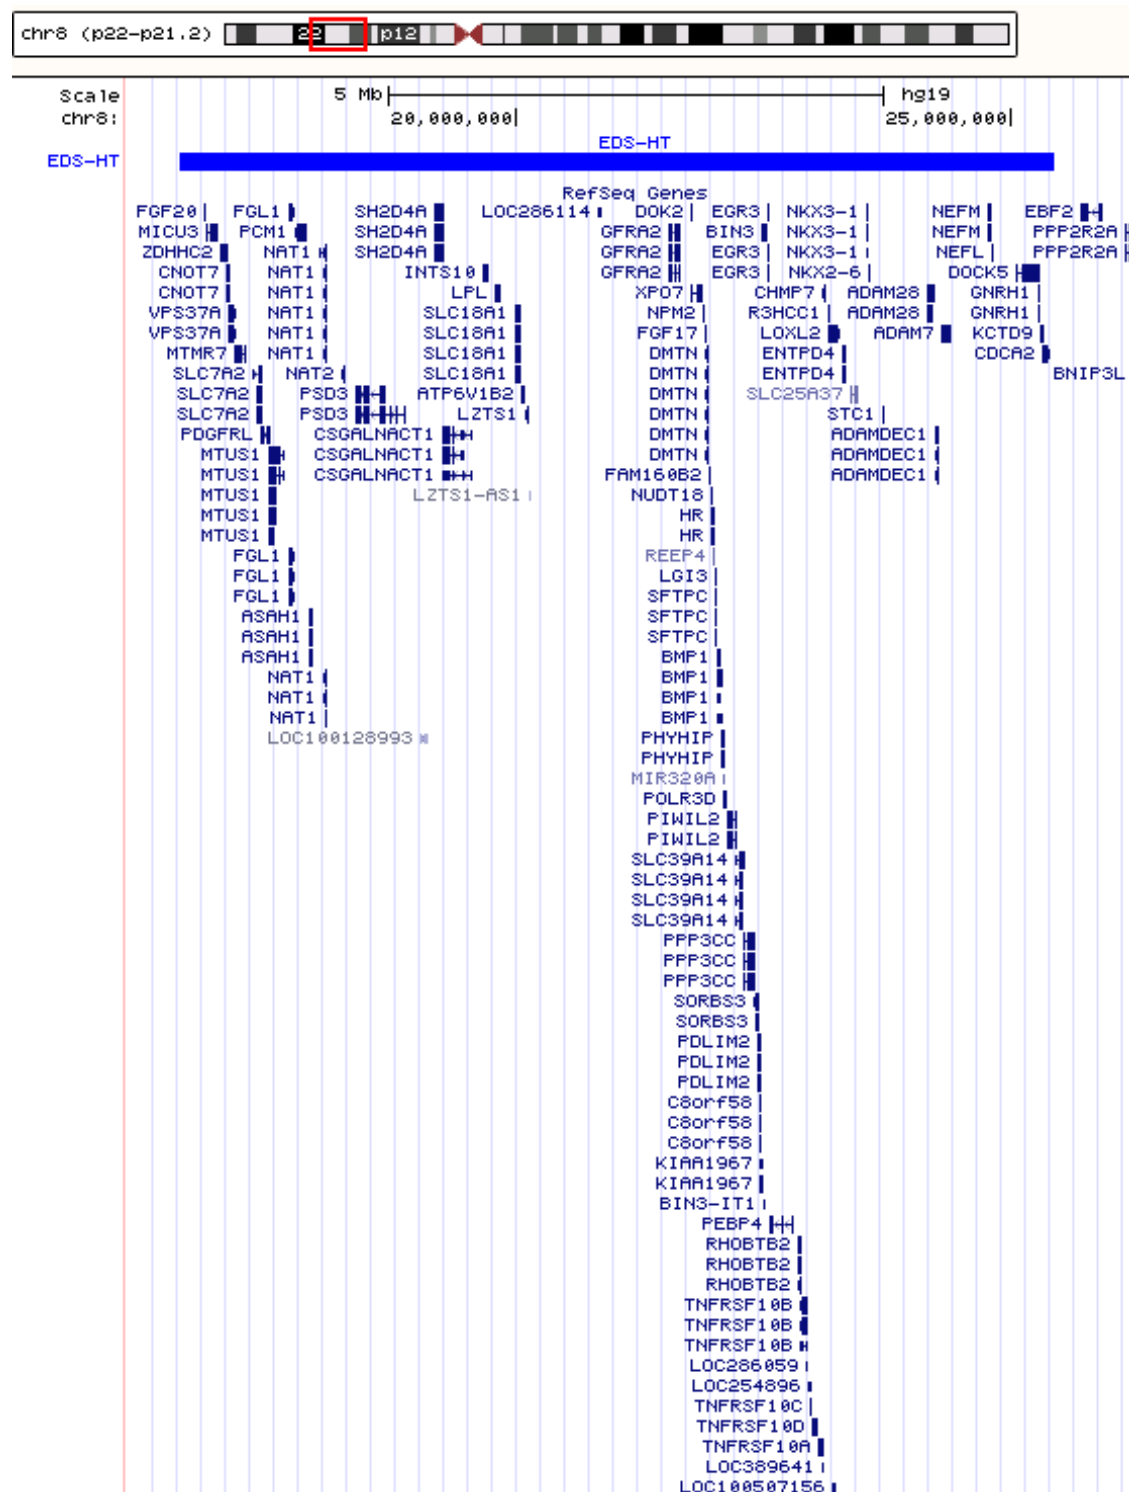

**Supplementary Figure S2:** RT-PCR based *LZTS1* expression in human tissues confirmed the highest *LZTS1* expression in brain and testes.

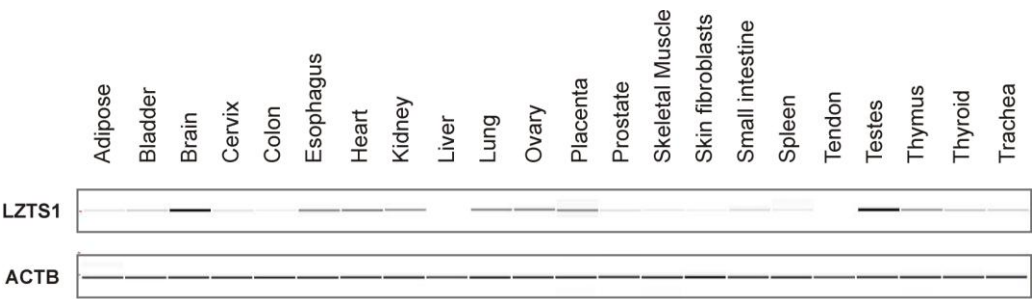

Supplement: f1 [file 828970.f1.pdf]
